# Supplementary material for: Metal binding and interdomain thermodynamics of mammalian metallothionein-3: enthalpically favoured Cu+supplants entropically favoured Zn2+to form Cu4+clusters under physiological conditions
Source: Royal Society of Chemistry journal article supplement (doi:10.1039/d2sc00676f), 2022-01-01
Supplement: d2sc00676f1.pdf [file d2sc00676f1.pdf]

Supporting Information for

**Metal Binding and Interdomain Thermodynamics of Mammalian Metallothionein-3:  
Enthalpically Favoured Cu<sup>+</sup> Supplants Entropically Favoured Zn<sup>2+</sup> to form Cu<sub>4</sub> Clusters  
Under Physiological Conditions**

Matthew R. Mehlenbacher, Rahma Elsiey, Rabina Lakha, Rhiza Lyne E. Villones, Marina Orman,  
Christina L. Vizcarra, Gabriele Meloni, Dean E. Wilcox, Rachel N. Austin

**Table of Contents**

- p. 2 Figure S1. Sequences of metallothioneins used in this study
- p. 5 Figure S2. SDS-PAGE of MT-2 and MT-3 samples
- p. 6 Figure S3. ITC data for DTPA → Zn<sup>2+</sup> titrations in different buffers
- p. 7 Figure S4. Proton plots of ITC data for DTPA → Zn<sub>7</sub>MT-3, Zn<sub>4</sub>αMT-3, Zn<sub>3</sub>βMT-3 titrations
- p. 8 Figure S5. Proton plots of ITC data for Cu<sup>+</sup>(GSH)<sub>2</sub> → Zn<sub>7</sub>MT-3 and Zn<sub>7</sub>MT-2 titrations
- p. 8 Table S1. Best fit ITC values for DTPA → Zn<sub>4</sub>αMT-3 titrations
- p. 8. Table S2. Best fit ITC values for DTPA → Zn<sub>3</sub>βMT-3 titrations
- p. 9. Scheme S1. Hess's Law analysis of enthalpy for DTPA → Zn<sub>7</sub>MT-3 titrations
- p. 9. Scheme S1. Hess's Law analysis of enthalpy for Cu<sup>+</sup>(GSH)<sub>2</sub> → Zn<sub>7</sub>MT-3 titrations
- p. 10. *Post hoc* analysis for binding constant (K) of chelation ITC titrations
- p. 11. Description of ITC measurements of Cu<sup>+</sup> → Zn<sub>7</sub>MT-3, Zn<sub>4</sub>αMT-3, Zn<sub>3</sub>βMT-3 titrations in excess MeCN
- p. 12. Figure S6. ITC data for Cu<sup>+</sup> → Zn<sub>7</sub>MT-3, Zn<sub>4</sub>αMT-3, Zn<sub>3</sub>βMT-3 titrations in excess MeCN

**Figure S1.** Sequences of metallothioneins used in this study

Codons for His<sub>6</sub>-GFP-tev-MT-3 (based on accession # NP\_038631.1):

|          |          |          |          |          |          |          |          |          |          |          |          |          |          |          |          |          |          |          |          |
|----------|----------|----------|----------|----------|----------|----------|----------|----------|----------|----------|----------|----------|----------|----------|----------|----------|----------|----------|----------|
| M        | G        | S        | S        | H        | H        | H        | H        | H        | H        | G        | S        | V        | S        | K        | G        | E        | E        | L        | F        |
| ATG      | GGC      | AGC      | AGC      | CAT      | CAT      | CAT      | CAT      | CAT      | CAC      | GGA      | TCC      | GTG      | AGC      | AAG      | GGC      | GAG      | GAG      | CTG      | TTC      |
| T        | G        | V        | V        | P        | I        | L        | V        | E        | L        | D        | G        | D        | V        | N        | G        | H        | K        | F        | S        |
| ACC      | GGG      | GTG      | GTG      | CCC      | ATC      | CTG      | GTC      | GAG      | CTG      | GAC      | GGC      | GAC      | GTA      | AAC      | GGC      | CAC      | AAG      | TTC      | AGC      |
| V        | S        | G        | E        | G        | E        | G        | D        | A        | T        | Y        | G        | K        | L        | T        | L        | K        | F        | I        | C        |
| GTG      | TCC      | GGC      | GAG      | GGC      | GAG      | GGC      | GAT      | GCC      | ACC      | TAC      | GGC      | AAG      | CTG      | ACC      | CTG      | AAG      | TTC      | ATC      | TGC      |
| T        | T        | G        | K        | L        | P        | V        | P        | W        | P        | T        | L        | V        | T        | T        | F        | T        | Y        | G        | V        |
| ACC      | ACC      | GGC      | AAG      | CTG      | CCC      | GTG      | CCC      | TGG      | CCC      | ACC      | CTC      | GTG      | ACC      | ACC      | TTC      | ACC      | TAC      | GGC      | GTG      |
| Q        | C        | F        | A        | R        | Y        | P        | D        | H        | M        | K        | Q        | H        | D        | F        | F        | K        | S        | A        | M        |
| CAG      | TGC      | TTC      | GCC      | CGC      | TAC      | CCC      | GAC      | CAC      | ATG      | AAG      | CAG      | CAC      | GAC      | TTC      | TTC      | AAG      | TCC      | GCC      | ATG      |
| P        | E        | G        | Y        | V        | Q        | E        | R        | T        | I        | F        | F        | K        | D        | D        | G        | N        | Y        | K        | T        |
| CCC      | GAA      | GGC      | TAC      | GTC      | CAG      | GAG      | CGC      | ACC      | ATC      | TTC      | TTC      | AAG      | GAC      | GAC      | GGC      | AAC      | TAC      | AAG      | ACC      |
| R        | A        | E        | V        | K        | F        | E        | G        | D        | T        | L        | V        | N        | R        | I        | E        | L        | K        | G        | I        |
| CGC      | GCC      | GAG      | GTG      | AAG      | TTC      | GAG      | GGC      | GAC      | ACC      | CTG      | GTG      | AAC      | CGC      | ATC      | GAG      | CTG      | AAG      | GGC      | ATC      |
| D        | F        | K        | E        | D        | G        | N        | I        | L        | G        | H        | K        | L        | E        | Y        | N        | Y        | N        | S        | H        |
| GAC      | TTC      | AAG      | GAG      | GAC      | GGC      | AAC      | ATC      | CTG      | GGG      | CAC      | AAG      | CTG      | GAG      | TAC      | AAC      | TAC      | AAC      | AGC      | CAC      |
| K        | V        | Y        | I        | T        | A        | D        | K        | Q        | K        | N        | G        | I        | K        | V        | N        | F        | K        | T        | R        |
| AAG      | GTC      | TAT      | ATC      | ACC      | GCC      | GAC      | AAG      | CAG      | AAG      | AAC      | GGC      | ATC      | AAG      | GTG      | AAC      | TTC      | AAG      | ACC      | CGC      |
| H        | N        | I        | E        | D        | G        | S        | V        | Q        | L        | A        | D        | H        | Y        | Q        | Q        | N        | T        | P        | I        |
| CAC      | AAC      | ATC      | GAG      | GAC      | GGC      | AGC      | GTG      | CAG      | CTC      | GCC      | GAC      | CAC      | TAC      | CAG      | CAG      | AAC      | ACC      | CCC      | ATC      |
| G        | D        | G        | P        | V        | L        | L        | P        | D        | N        | H        | Y        | L        | S        | T        | Q        | S        | A        | L        | S        |
| GGC      | GAC      | GGC      | CCC      | GTG      | CTG      | CTG      | CCC      | GAC      | AAC      | CAC      | TAC      | CTG      | AGC      | ACC      | CAG      | TCC      | GCC      | CTG      | AGC      |
| K        | D        | P        | N        | E        | K        | R        | D        | H        | M        | V        | L        | L        | E        | F        | V        | T        | A        | A        | G        |
| AAA      | GAC      | CCC      | AAC      | GAG      | AAG      | CGC      | GAT      | CAC      | ATG      | GTC      | CTG      | CTG      | GAG      | TTC      | GTG      | ACC      | GCC      | GCC      | GGG      |
| I        | T        | L        | G        | M        | D        | E        | L        | Y        | K        | E        | N        | L        | Y        | F        | Q        | G        | S        | M        | D        |
| ATC      | ACT      | CTC      | GGC      | ATG      | GAC      | GAG      | CTG      | TAC      | AAG      | GAA      | AAC      | CTG      | TAC      | TTC      | CAG      | GGC      | TCC      | ATG      | GAC      |
| 3        | 4        | 5        | 6        | 7        | 8        | 9        | 10       | 11       | 12       | 13       | 14       | 15       | 16       | 17       | 18       | 19       | 20       | 21       | 22       |
| <b>P</b> | <b>E</b> | <b>T</b> | <b>C</b> | <b>P</b> | <b>C</b> | <b>P</b> | <b>T</b> | <b>G</b> | <b>G</b> | <b>S</b> | <b>C</b> | <b>T</b> | <b>C</b> | <b>S</b> | <b>D</b> | <b>K</b> | <b>C</b> | <b>K</b> | <b>C</b> |
| CCA      | GAG      | ACG      | TGT      | CCG      | TGT      | CCT      | ACG      | GGG      | GGT      | TCA      | TGC      | ACA      | TGC      | TCT      | GAC      | AAA      | TGT      | AAG      | TGT      |
| 23       | 24       | 25       | 26       | 27       | 28       | 29       | 30       | 31       | 32       | 33       | 34       | 35       | 36       | 37       | 38       | 39       | 40       | 41       | 42       |
| <b>K</b> | <b>G</b> | <b>C</b> | <b>K</b> | <b>C</b> | <b>T</b> | <b>N</b> | <b>C</b> | <b>K</b> | <b>K</b> | <b>S</b> | <b>C</b> | <b>C</b> | <b>S</b> | <b>C</b> | <b>C</b> | <b>P</b> | <b>A</b> | <b>G</b> | <b>C</b> |
| AAA      | GGA      | TGT      | AAA      | TGT      | ACC      | AAT      | TGT      | AAA      | AAA      | AGT      | TGC      | TGC      | TCT      | TGT      | TGT      | CCA      | GCG      | GGC      | TGT      |
| 43       | 44       | 45       | 46       | 47       | 48       | 49       | 50       | 51       | 52       | 53       | 54       | 55       | 56       | 57       | 58       | 59       | 60       | 61       | 62       |
| <b>E</b> | <b>K</b> | <b>C</b> | <b>A</b> | <b>K</b> | <b>D</b> | <b>C</b> | <b>V</b> | <b>C</b> | <b>K</b> | <b>G</b> | <b>E</b> | <b>E</b> | <b>G</b> | <b>A</b> | <b>K</b> | <b>A</b> | <b>E</b> | <b>A</b> | <b>E</b> |
| GAG      | AAA      | TGT      | GCG      | AAA      | GAC      | TGC      | GTT      | TGT      | AAA      | GGC      | GAG      | GAA      | GGA      | GCC      | AAA      | GCT      | GAG      | GCG      | GAG      |
| 63       | 64       | 65       | 66       | 67       | 68       |          |          |          |          |          |          |          |          |          |          |          |          |          |          |
| <b>K</b> | <b>C</b> | <b>S</b> | <b>C</b> | <b>C</b> | <b>Q</b> | .        |          |          |          |          |          |          |          |          |          |          |          |          |          |
| AAA      | TGT      | TCG      | TGC      | TGT      | CAG      | TGA      |          |          |          |          |          |          |          |          |          |          |          |          |          |

Cleaved MT-3 protein sequence used in ITC experiments:

**GSMDPETPCPTGGSCTCSDKCKCKGCKCTNCKKSCCSCCPAGCEKCAKDCVCKGEEGAKAEAEKSCCCQ**

Figure S1. *continued.*

Codons for His<sub>6</sub>-GFP-tev-βMT-3 (based on accession # NP\_038631.1):

|          |          |          |          |          |          |          |          |          |          |          |          |          |          |          |          |          |          |          |          |
|----------|----------|----------|----------|----------|----------|----------|----------|----------|----------|----------|----------|----------|----------|----------|----------|----------|----------|----------|----------|
| M        | G        | S        | S        | H        | H        | H        | H        | H        | H        | G        | S        | V        | S        | K        | G        | E        | E        | L        | F        |
| ATG      | GGC      | AGC      | AGC      | CAT      | CAT      | CAT      | CAT      | CAT      | CAC      | GGA      | TCC      | GTG      | AGC      | AAG      | GGC      | GAG      | GAG      | CTG      | TTC      |
| T        | G        | V        | V        | P        | I        | L        | V        | E        | L        | D        | G        | D        | V        | N        | G        | H        | K        | F        | S        |
| ACC      | GGG      | GTG      | GTG      | CCC      | ATC      | CTG      | GTC      | GAG      | CTG      | GAC      | GGC      | GAC      | GTA      | AAC      | GGC      | CAC      | AAG      | TTC      | AGC      |
| V        | S        | G        | E        | G        | E        | G        | D        | A        | T        | Y        | G        | K        | L        | T        | L        | K        | F        | I        | C        |
| GTG      | TCC      | GGC      | GAG      | GGC      | GAG      | GGC      | GAT      | GCC      | ACC      | TAC      | GGC      | AAG      | CTG      | ACC      | CTG      | AAG      | TTC      | ATC      | TGC      |
| T        | T        | G        | K        | L        | P        | V        | P        | W        | P        | T        | L        | V        | T        | T        | F        | T        | Y        | G        | V        |
| ACC      | ACC      | GGC      | AAG      | CTG      | CCC      | GTG      | CCC      | TGG      | CCC      | ACC      | CTC      | GTG      | ACC      | ACC      | TTC      | ACC      | TAC      | GGC      | GTG      |
| Q        | C        | F        | A        | R        | Y        | P        | D        | H        | M        | K        | Q        | H        | D        | F        | F        | K        | S        | A        | M        |
| CAG      | TGC      | TTC      | GCC      | CGC      | TAC      | CCC      | GAC      | CAC      | ATG      | AAG      | CAG      | CAC      | GAC      | TTC      | TTC      | AAG      | TCC      | GCC      | ATG      |
| P        | E        | G        | Y        | V        | Q        | E        | R        | T        | I        | F        | F        | K        | D        | D        | G        | N        | Y        | K        | T        |
| CCC      | GAA      | GGC      | TAC      | GTC      | CAG      | GAG      | CGC      | ACC      | ATC      | TTC      | TTC      | AAG      | GAC      | GAC      | GGC      | AAC      | TAC      | AAG      | ACC      |
| R        | A        | E        | V        | K        | F        | E        | G        | D        | T        | L        | V        | N        | R        | I        | E        | L        | K        | G        | I        |
| CGC      | GCC      | GAG      | GTG      | AAG      | TTC      | GAG      | GGC      | GAC      | ACC      | CTG      | GTG      | AAC      | CGC      | ATC      | GAG      | CTG      | AAG      | GGC      | ATC      |
| D        | F        | K        | E        | D        | G        | N        | I        | L        | G        | H        | K        | L        | E        | Y        | N        | Y        | N        | S        | H        |
| GAC      | TTC      | AAG      | GAG      | GAC      | GGC      | AAC      | ATC      | CTG      | GGG      | CAC      | AAG      | CTG      | GAG      | TAC      | AAC      | TAC      | AAC      | AGC      | CAC      |
| K        | V        | Y        | I        | T        | A        | D        | K        | Q        | K        | N        | G        | I        | K        | V        | N        | F        | K        | T        | R        |
| AAG      | GTC      | TAT      | ATC      | ACC      | GCC      | GAC      | AAG      | CAG      | AAG      | AAC      | GGC      | ATC      | AAG      | GTG      | AAC      | TTC      | AAG      | ACC      | CGC      |
| H        | N        | I        | E        | D        | G        | S        | V        | Q        | L        | A        | D        | H        | Y        | Q        | Q        | N        | T        | P        | I        |
| CAC      | AAC      | ATC      | GAG      | GAC      | GGC      | AGC      | GTG      | CAG      | CTC      | GCC      | GAC      | CAC      | TAC      | CAG      | CAG      | AAC      | ACC      | CCC      | ATC      |
| G        | D        | G        | P        | V        | L        | L        | P        | D        | N        | H        | Y        | L        | S        | T        | Q        | S        | A        | L        | S        |
| GGC      | GAC      | GGC      | CCC      | GTG      | CTG      | CTG      | CCC      | GAC      | AAC      | CAC      | TAC      | CTG      | AGC      | ACC      | CAG      | TCC      | GCC      | CTG      | AGC      |
| K        | D        | P        | N        | E        | K        | R        | D        | H        | M        | V        | L        | L        | E        | F        | V        | T        | A        | A        | G        |
| AAA      | GAC      | CCC      | AAC      | GAG      | AAG      | CGC      | GAT      | CAC      | ATG      | GTC      | CTG      | CTG      | GAG      | TTC      | GTG      | ACC      | GCC      | GCC      | GGG      |
| I        | T        | L        | G        | M        | D        | E        | L        | Y        | K        | E        | N        | L        | Y        | F        | Q        | G        | S        | M        | D        |
| ATC      | ACT      | CTC      | GGC      | ATG      | GAC      | GAG      | CTG      | TAC      | AAG      | GAA      | AAC      | CTG      | TAC      | TTC      | CAG      | GGC      | TCC      | ATG      | GAC      |
| 3        | 4        | 5        | 6        | 7        | 8        | 9        | 10       | 11       | 12       | 13       | 14       | 15       | 16       | 17       | 18       | 19       | 20       | 21       | 22       |
| <b>P</b> | <b>E</b> | <b>T</b> | <b>C</b> | <b>P</b> | <b>C</b> | <b>P</b> | <b>T</b> | <b>G</b> | <b>G</b> | <b>S</b> | <b>C</b> | <b>T</b> | <b>C</b> | <b>S</b> | <b>D</b> | <b>K</b> | <b>C</b> | <b>K</b> | <b>C</b> |
| CCA      | GAG      | ACG      | TGT      | CCG      | TGT      | CCT      | ACG      | GGG      | GGT      | TCA      | TGC      | ACA      | TGC      | TCT      | GAC      | AAA      | TGT      | AAG      | TGT      |
| 23       | 24       | 25       | 26       | 27       | 28       | 29       | 30       | 31       |          |          |          |          |          |          |          |          |          |          |          |
| <b>K</b> | <b>G</b> | <b>C</b> | <b>K</b> | <b>C</b> | <b>T</b> | <b>N</b> | <b>C</b> | <b>K</b> | .        |          |          |          |          |          |          |          |          |          |          |
| AAA      | GGA      | TGT      | AAA      | TGT      | ACC      | AAT      | TGT      | AAA      | TG       |          |          |          |          |          |          |          |          |          |          |

Cleaved βMT-3 protein sequence used in ITC experiments:

**GSMDPETPCPTGGSCTCSDKCKCKGCKTNCK**

Figure S1. *continued.*

Codons for His<sub>6</sub>-GFP-tev- $\alpha$ MT-3 (based on accession # NP\_038631.1):

|          |          |          |          |          |          |          |          |          |          |          |          |          |          |          |          |          |          |          |          |
|----------|----------|----------|----------|----------|----------|----------|----------|----------|----------|----------|----------|----------|----------|----------|----------|----------|----------|----------|----------|
| M        | G        | S        | S        | H        | H        | H        | H        | H        | H        | G        | S        | V        | S        | K        | G        | E        | E        | L        | F        |
| ATG      | GGC      | AGC      | AGC      | CAT      | CAT      | CAT      | CAT      | CAT      | CAC      | GGA      | TCC      | GTG      | AGC      | AAG      | GGC      | GAG      | GAG      | CTG      | TTC      |
| T        | G        | V        | V        | P        | I        | L        | V        | E        | L        | D        | G        | D        | V        | N        | G        | H        | K        | F        | S        |
| ACC      | GGG      | GTG      | GTG      | CCC      | ATC      | CTG      | GTC      | GAG      | CTG      | GAC      | GGC      | GAC      | GTA      | AAC      | GGC      | CAC      | AAG      | TTC      | AGC      |
| V        | S        | G        | E        | G        | E        | G        | D        | A        | T        | Y        | G        | K        | L        | T        | L        | K        | F        | I        | C        |
| GTG      | TCC      | GGC      | GAG      | GGC      | GAG      | GGC      | GAT      | GCC      | ACC      | TAC      | GGC      | AAG      | CTG      | ACC      | CTG      | AAG      | TTC      | ATC      | TGC      |
| T        | T        | G        | K        | L        | P        | V        | P        | W        | P        | T        | L        | V        | T        | T        | F        | T        | Y        | G        | V        |
| ACC      | ACC      | GGC      | AAG      | CTG      | CCC      | GTG      | CCC      | TGG      | CCC      | ACC      | CTC      | GTG      | ACC      | ACC      | TTC      | ACC      | TAC      | GGC      | GTG      |
| Q        | C        | F        | A        | R        | Y        | P        | D        | H        | M        | K        | Q        | H        | D        | F        | F        | K        | S        | A        | M        |
| CAG      | TGC      | TTC      | GCC      | CGC      | TAC      | CCC      | GAC      | CAC      | ATG      | AAG      | CAG      | CAC      | GAC      | TTC      | TTC      | AAG      | TCC      | GCC      | ATG      |
| P        | E        | G        | Y        | V        | Q        | E        | R        | T        | I        | F        | F        | K        | D        | D        | G        | N        | Y        | K        | T        |
| CCC      | GAA      | GGC      | TAC      | GTC      | CAG      | GAG      | CGC      | ACC      | ATC      | TTC      | TTC      | AAG      | GAC      | GAC      | GGC      | AAC      | TAC      | AAG      | ACC      |
| R        | A        | E        | V        | K        | F        | E        | G        | D        | T        | L        | V        | N        | R        | I        | E        | L        | K        | G        | I        |
| CGC      | GCC      | GAG      | GTG      | AAG      | TTC      | GAG      | GGC      | GAC      | ACC      | CTG      | GTG      | AAC      | CGC      | ATC      | GAG      | CTG      | AAG      | GGC      | ATC      |
| D        | F        | K        | E        | D        | G        | N        | I        | L        | G        | H        | K        | L        | E        | Y        | N        | Y        | N        | S        | H        |
| GAC      | TTC      | AAG      | GAG      | GAC      | GGC      | AAC      | ATC      | CTG      | GGG      | CAC      | AAG      | CTG      | GAG      | TAC      | AAC      | TAC      | AAC      | AGC      | CAC      |
| K        | V        | Y        | I        | T        | A        | D        | K        | Q        | K        | N        | G        | I        | K        | V        | N        | F        | K        | T        | R        |
| AAG      | GTC      | TAT      | ATC      | ACC      | GCC      | GAC      | AAG      | CAG      | AAG      | AAC      | GGC      | ATC      | AAG      | GTG      | AAC      | TTC      | AAG      | ACC      | CGC      |
| H        | N        | I        | E        | D        | G        | S        | V        | Q        | L        | A        | D        | H        | Y        | Q        | Q        | N        | T        | P        | I        |
| CAC      | AAC      | ATC      | GAG      | GAC      | GGC      | AGC      | GTG      | CAG      | CTC      | GCC      | GAC      | CAC      | TAC      | CAG      | CAG      | AAC      | ACC      | CCC      | ATC      |
| G        | D        | G        | P        | V        | L        | L        | P        | D        | N        | H        | Y        | L        | S        | T        | Q        | S        | A        | L        | S        |
| GGC      | GAC      | GGC      | CCC      | GTG      | CTG      | CTG      | CCC      | GAC      | AAC      | CAC      | TAC      | CTG      | AGC      | ACC      | CAG      | TCC      | GCC      | CTG      | AGC      |
| K        | D        | P        | N        | E        | K        | R        | D        | H        | M        | V        | L        | L        | E        | F        | V        | T        | A        | A        | G        |
| AAA      | GAC      | CCC      | AAC      | GAG      | AAG      | CGC      | GAT      | CAC      | ATG      | GTC      | CTG      | CTG      | GAG      | TTC      | GTG      | ACC      | GCC      | GCC      | GGG      |
| I        | T        | L        | G        | M        | D        | E        | L        | Y        | K        | E        | N        | L        | Y        | F        | Q        | G        | S        | K        | S        |
| ATC      | ACT      | CTC      | GGC      | ATG      | GAC      | GAG      | CTG      | TAC      | AAG      | GAA      | AAC      | CTG      | TAC      | TTC      | CAG      | GGC      | TCC      | AAA      | AGT      |
| 34       | 35       | 36       | 37       | 38       | 39       | 40       | 41       | 42       | 43       | 44       | 45       | 46       | 47       | 48       | 49       | 50       | 51       | 52       | 53       |
| <b>C</b> | <b>C</b> | <b>S</b> | <b>C</b> | <b>C</b> | <b>P</b> | <b>A</b> | <b>G</b> | <b>C</b> | <b>E</b> | <b>K</b> | <b>C</b> | <b>A</b> | <b>K</b> | <b>D</b> | <b>C</b> | <b>V</b> | <b>C</b> | <b>K</b> | <b>G</b> |
| TGC      | TGC      | TCT      | TGT      | TGT      | CCA      | GCG      | GGC      | TGT      | GAG      | AAA      | TGT      | GCG      | AAA      | GAC      | TGC      | GTT      | TGT      | AAA      | GGC      |
| 54       | 55       | 56       | 57       | 58       | 59       | 60       | 61       | 62       | 63       | 64       | 65       | 66       | 67       | 68       |          |          |          |          |          |
| <b>E</b> | <b>E</b> | <b>G</b> | <b>A</b> | <b>K</b> | <b>A</b> | <b>E</b> | <b>A</b> | <b>E</b> | <b>K</b> | <b>C</b> | <b>S</b> | <b>C</b> | <b>C</b> | <b>Q</b> | .        |          |          |          |          |
| GAG      | GAA      | GGA      | GCC      | AAA      | GCT      | GAG      | GCG      | GAG      | AAA      | TGT      | TCG      | TGC      | TGT      | CAG      | TGA      |          |          |          |          |

Cleaved  $\alpha$ MT-3 protein sequence used in ITC experiments:

**GSKSCCSCPAGCEKCAKDCVCKGEEGAKAEAEKSCCQ**

Figure S1. *continued.*

Codons for **MT-2** (based on accession # NP\_005944.1):

|          |          |          |          |          |          |          |          |          |          |          |          |          |          |          |          |          |          |          |          |
|----------|----------|----------|----------|----------|----------|----------|----------|----------|----------|----------|----------|----------|----------|----------|----------|----------|----------|----------|----------|
| 1        | 2        | 3        | 4        | 5        | 6        | 7        | 8        | 9        | 10       | 11       | 12       | 13       | 14       | 15       | 16       | 17       | 18       | 19       | 20       |
| <b>M</b> | <b>D</b> | <b>P</b> | <b>N</b> | <b>C</b> | <b>S</b> | <b>C</b> | <b>A</b> | <b>A</b> | <b>G</b> | <b>D</b> | <b>S</b> | <b>C</b> | <b>T</b> | <b>C</b> | <b>A</b> | <b>G</b> | <b>S</b> | <b>C</b> | <b>K</b> |
| ATG      | GAC      | CCG      | AAC      | TGC      | AGC      | TGC      | GCG      | GCG      | GGT      | GAC      | AGC      | TGC      | ACC      | TGC      | GCG      | GGC      | AGC      | TGC      | AAG      |
| 21       | 22       | 23       | 24       | 25       | 26       | 27       | 28       | 29       | 30       | 31       | 32       | 33       | 34       | 35       | 36       | 37       | 38       | 39       | 40       |
| <b>C</b> | <b>K</b> | <b>E</b> | <b>C</b> | <b>K</b> | <b>C</b> | <b>T</b> | <b>S</b> | <b>C</b> | <b>K</b> | <b>K</b> | <b>S</b> | <b>C</b> | <b>C</b> | <b>S</b> | <b>C</b> | <b>C</b> | <b>P</b> | <b>V</b> | <b>G</b> |
| TGC      | AAA      | GAG      | TGC      | AAG      | TGC      | ACC      | AGC      | TGC      | AAG      | AAA      | AGC      | TGC      | TGC      | AGC      | TGC      | TGC      | CCG      | GTG      | GGT      |
| 41       | 42       | 43       | 44       | 45       | 46       | 47       | 48       | 49       | 50       | 51       | 52       | 53       | 54       | 55       | 56       | 57       | 58       | 59       | 60       |
| <b>C</b> | <b>A</b> | <b>K</b> | <b>C</b> | <b>A</b> | <b>Q</b> | <b>G</b> | <b>C</b> | <b>I</b> | <b>C</b> | <b>K</b> | <b>G</b> | <b>A</b> | <b>S</b> | <b>D</b> | <b>K</b> | <b>C</b> | <b>S</b> | <b>C</b> | <b>C</b> |
| TGC      | GCG      | AAA      | TGC      | GCG      | CAG      | GGT      | TGC      | ATC      | TGC      | AAG      | GGC      | GCG      | AGC      | GAT      | AAA      | TGC      | AGC      | TGC      | TGC      |
| 61       |          |          |          |          |          |          |          |          |          |          |          |          |          |          |          |          |          |          |          |
| <b>A</b> | .        |          |          |          |          |          |          |          |          |          |          |          |          |          |          |          |          |          |          |
| GCG      | TAA      |          |          |          |          |          |          |          |          |          |          |          |          |          |          |          |          |          |          |

MT-2 protein sequence used in ITC experiments:

**MDPNCSAAGDSCTCAGSCKCKECKCTSCCKSCCSCPVGCAKCAQGCICKGASDKSCCA**

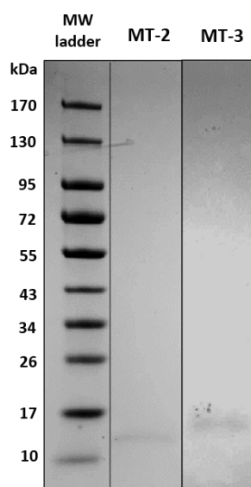

**Figure S2.** SDS-PAGE of fractions containing MT-2 and MT-3 obtained upon the reaction of  $\text{Cu}^+$  with  $\text{Zn}_7\text{MTs}$  and subsequent MT separation by Size Exclusion Chromatography (SEC). The MT Cys residues were modified with monobromobimane (mBrB) prior to SDS-PAGE and the protein bands were stained with Coomassie Blue.

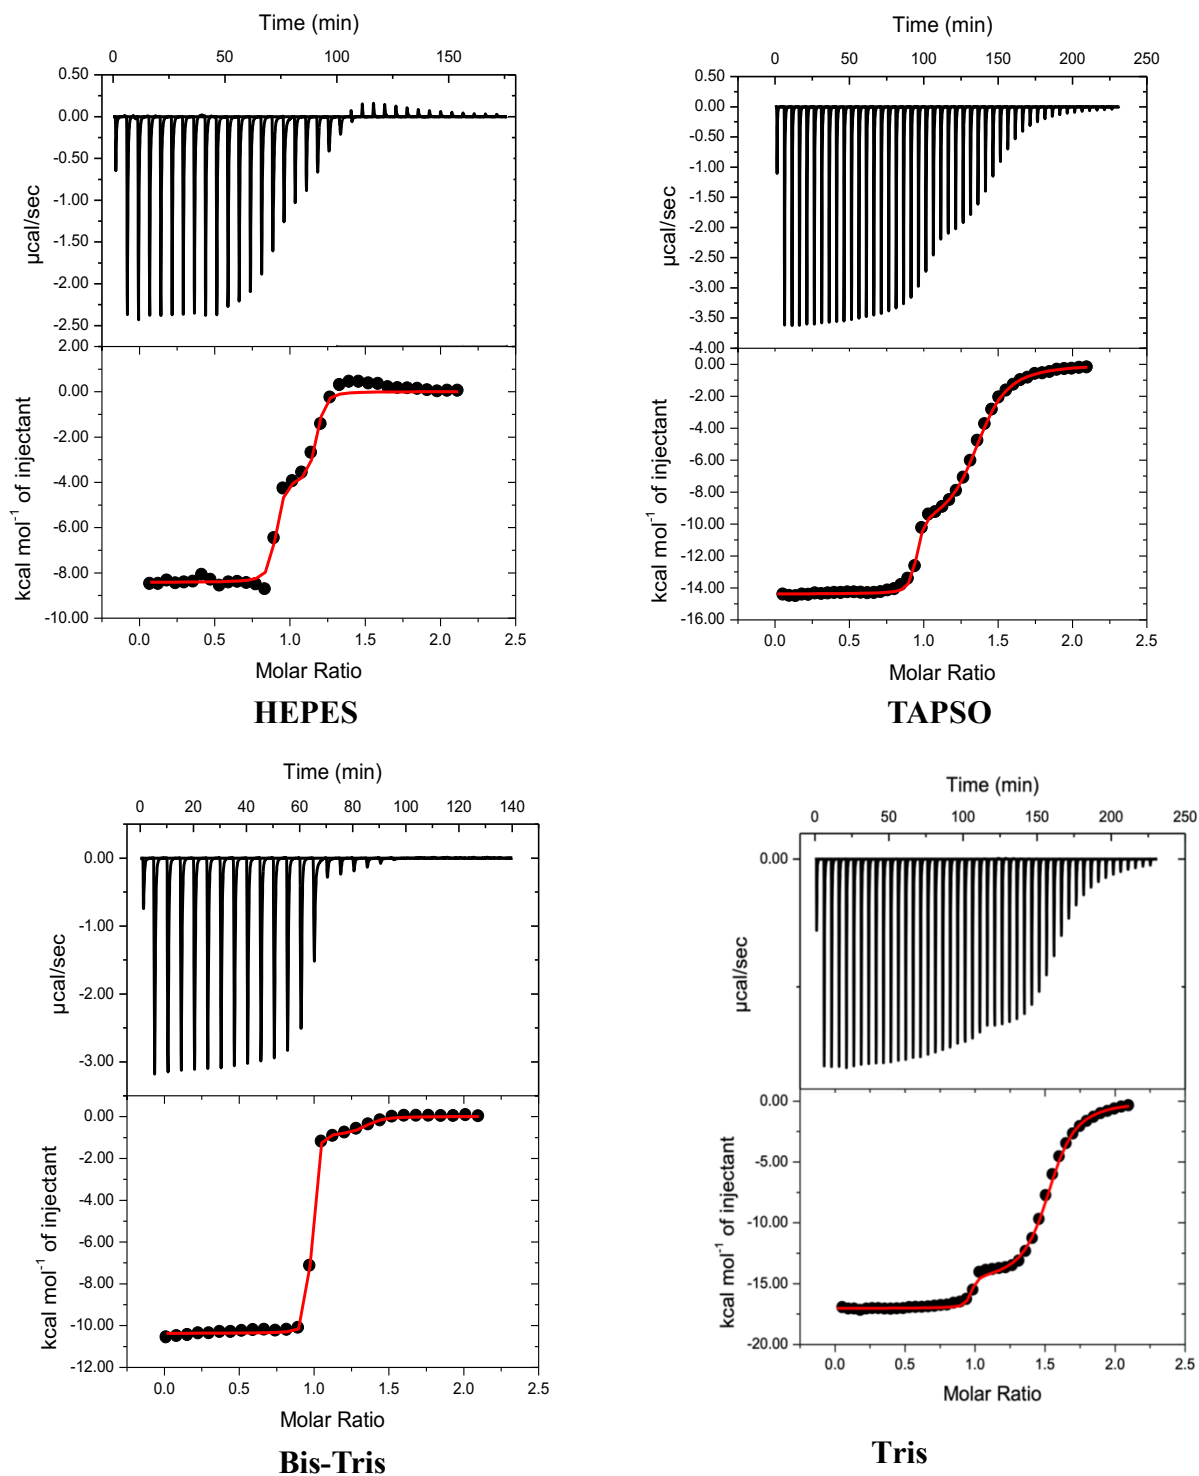

**Figure S3.** Representative thermograms for DTPA titrations into  $Zn^{2+}$  in HEPES, Bis-Tris, TAPSO and Tris buffers (100 mM buffer, 150 mM NaCl, pH 7.4); fits to a 2-sites binding model give  $n = 1$  for the first event, formation of the 1:1 DTPA- $Zn^{2+}$  species, followed by an event with  $n \sim 0.5$ , corresponding to the subsequent formation of the 3:2 DTPA: $Zn^{2+}$  species

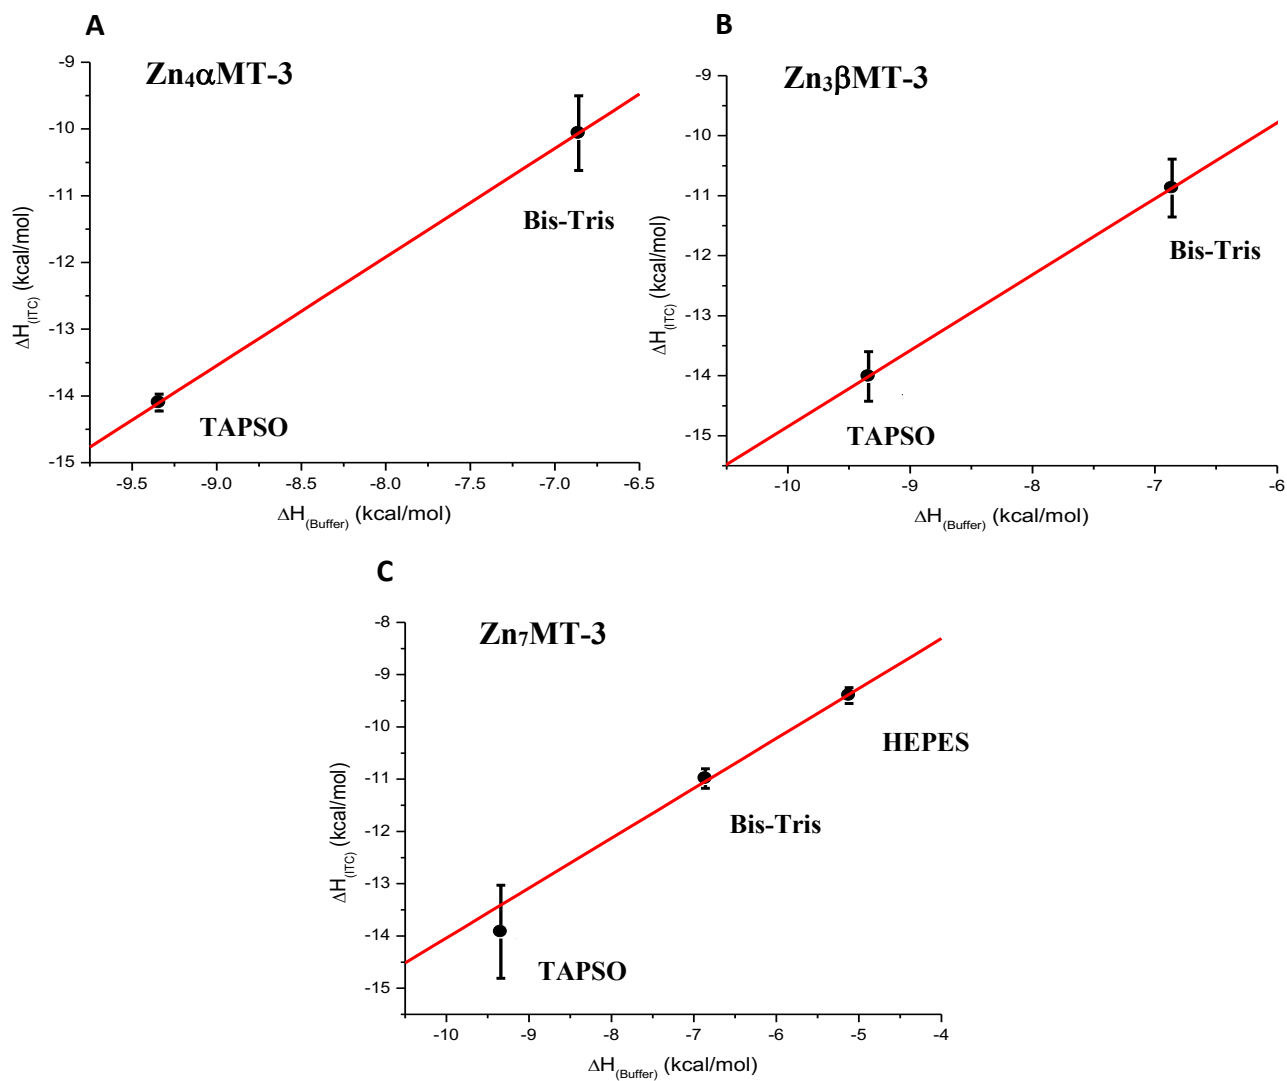

**Figure S4.** Plots of the experimental enthalpy ( $\Delta H_{\text{ITC}}$ ) versus the buffer protonation enthalpy ( $\Delta H_{\text{buffer}}$ ) in 2-3 different buffers for DTPA chelation of  $\text{Zn}^{2+}$  from **A.**  $\text{Zn}_4\alpha\text{MT-3}$ , slope =  $+1.6 \pm 0.3$ , **B.**  $\text{Zn}_3\beta\text{MT-3}$ , slope =  $+1.3 \pm 0.3$ , and **C.**  $\text{Zn}_7\text{MT-3}$ , slope =  $+1.0 \pm 0.1$ , where the slope quantifies the number of protons binding to, or released from, the buffer.

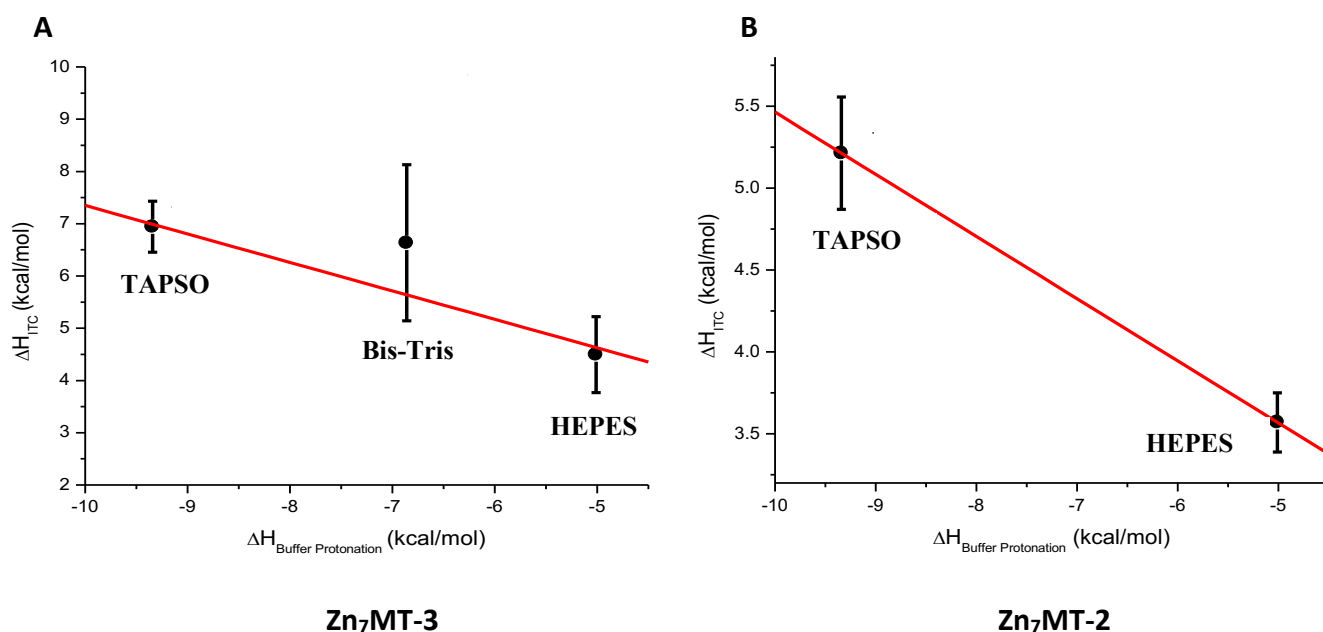

**Figure S5.** Plots of the experimental enthalpy ( $\Delta H_{ITC}$ ) versus the buffer protonation enthalpy ( $\Delta H_{buffer}$ ) in 2-3 different buffers for  $Cu^+$  titrations into  $Zn_7MT$  in excess GSH; **A.**  $Zn_7MT-3$ , slope =  $-0.5 \pm 0.2$  and **B.**  $Zn_7MT-2$ , slope =  $-0.4 \pm 0.1$ , where the slope quantifies the number of protons binding to, or released from, the buffer.

**Table S1.** Average best-fit experimental values for DTPA chelation of  $Zn^{2+}$  from  $Zn_4\alpha MT-3$  obtained from fits of the first binding event, which is the chelation of  $Zn^{2+}$  from the protein.

| buffer   | $n_{ITC}$     | $K_{ITC}$                   | $\Delta H^{\circ}_{ITC}$ (kcal/mol) |
|----------|---------------|-----------------------------|-------------------------------------|
| Bis-Tris | $4.4 \pm 0.3$ | $9 (\pm 5) \times 10^7$     | $-10.1 \pm 0.6$                     |
| TAPSO    | $4.2 \pm 0.2$ | $6.5 (\pm 0.3) \times 10^6$ | $-14.1 \pm 0.1$                     |

**Table S2.** Average best-fit experimental values for DTPA chelation of  $Zn^{2+}$  from  $Zn_3\beta MT-3$  obtained from fits of the first binding event, which is the chelation of  $Zn^{2+}$  from the protein.

| buffer   | $n_{ITC}$     | $K_{ITC}$                   | $\Delta H^{\circ}_{ITC}$ (kcal/mol) |
|----------|---------------|-----------------------------|-------------------------------------|
| Bis-Tris | $2.6 \pm 0.1$ | $2.8 (\pm 0.6) \times 10^7$ | $-10.9 \pm 0.5$                     |
| TAPSO    | $2.8 \pm 0.2$ | $4 (\pm 1) \times 10^6$     | $-14.1 \pm 0.4$                     |



**Scheme S1.** Relevant equilibria for DTPA chelation of  $Zn^{2+}$  from  $Zn_7MT-3$  at pH 7.4. DTPA has two relevant  $pK_a$ 's: 8.60, which provides  $0.91 H^+$ , and 10.55, which provides  $1 H^+$  ( $13.4 H^+$  released from 7 DTPA upon  $Zn^{2+}$  binding at pH 7.4)  $\Delta H_{ML}$  is the enthalpy of the metal (M) – ligand (L) interaction,  $\Delta H_{LH1}$  and  $\Delta H_{LH2}$  are the enthalpies of deprotonation of the ligand ( $H_1$  and  $H_2$ ),  $\Delta H_{PH}$  is the enthalpy of the protonation of the protein (P),  $\Delta H_{BH}$  is the enthalpy of buffer (B) protonation, and  $\Delta H_{MP}$  is the enthalpy of the desired metal-protein interaction.

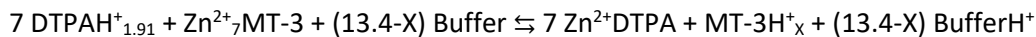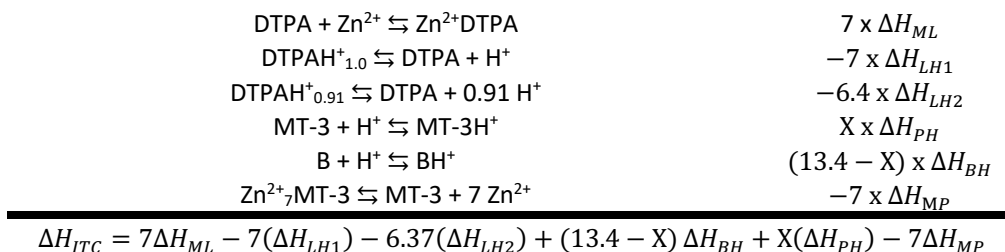

**Scheme S2.** Relevant equilibria for  $Cu^+$  binding to MT-3 in the presence of excess GSH at pH 7.4. Each GSH picks up  $0.8 H^+$  when released from the  $Cu^+(GSH)_2$  complex ( $9.6 H^+$  bind to 12 GSH upon release from  $Cu^+$  at pH 7.4).  $\Delta H_{ML}$  is the enthalpy of the metal (M) – ligand (L) interaction,  $\Delta H_{LH}$  is the enthalpy of protonation of the ligand,  $\Delta H_{PH}$  is the enthalpy of the protonation of the protein (P),  $\Delta H_{BH}$  is the enthalpy of buffer (B) protonation, and  $\Delta H_{MP}$  is the enthalpy of the desired metal-protein interaction.

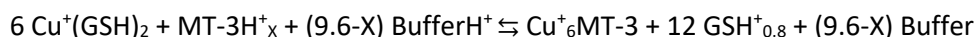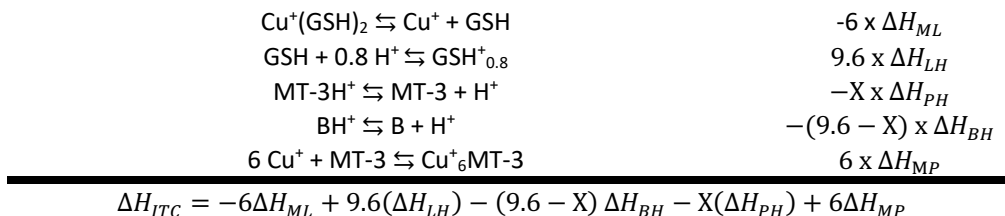

### Post-hoc Analysis to Determine the Binding Constant from Chelation Measurements

Consider the following experimental equilibrium constant for the chelation of a metal (M) from the protein (P) using ligand (L) (e.g.,  $L + MP \rightarrow P + ML$ ):

$$K_{ITC} = \frac{[ML]}{[M]_{ITC}[L]_{ITC}} \quad \text{Eq. 1}$$

where  $[M]_{ITC}$  and  $[L]_{ITC}$  are the concentrations of all metal and ligand species, respectively, except the ML complex. The total concentrations of the metal ( $C_M$ ) and the ligand ( $C_L$ ), where two protonation states are considered for the ligand, are:

$$C_M = [M] + [MP] + [ML] \quad \text{Eq. 2}$$

$$C_L = [L] + [L_{H1}] + [L_{H2}] + [ML] \quad \text{Eq. 3}$$

Each species has an equilibrium formation constant defined in Eqs. 4, 5, 6, and 7:

$$K_{MP} = \frac{[MP]}{[M][P]} \quad \text{Eq. 4}$$

$$K_{ML} = \frac{[ML]}{[M][L]} \quad \text{Eq. 5}$$

$$K_{LH1} = \frac{[LH]}{[L][H]} \quad \text{Eq. 6}$$

$$K_{LH2} = \frac{[LH_2]}{[LH][H]} \quad \text{Eq. 7}$$

Equation 8 can be introduced:

$$K_{LH1} \times K_{LH2} = \beta_{LH} \quad \text{Eq. 8}$$

We now consider the species included in  $[M]_{ITC}$  and  $[L]_{ITC}$ :

$$[M]_{ITC} = C_M - [ML] = [M] + [MP] = [M] + K_{MP}[M][P] = [M](1 + K_{MP}[P]) \quad \text{Eq. 9}$$

$$[L]_{ITC} = C_L - [ML] = [L] + [L_{H1}] + [L_{H2}] = [L](1 + K_{LH1}[H^+] + \beta_{LH}[H^+]^2) \quad \text{Eq. 10}$$

Substituting these into the original experimental equilibrium expression (Eq. 1):

$$K_{ITC} = \frac{[ML]}{[M][L]} \times \frac{1}{(1 + K_{MP}[P])} \times \frac{1}{(1 + K_{LH1}[H^+] + \beta_{LH}[H^+]^2)} \quad Eq. 11$$

Finally, this equation can be rearranged to solve for the metal-protein equilibrium constant:

$$K_{MP} = \left( \frac{K_{ML}}{K_{ITC} (1 + K_{LH1}[H^+] + \beta_{LH}[H^+]^2)} - 1 \right) / [P] \quad Eq. 12$$

The equilibrium constant,  $K_{MP}$ , from the chelation of  $Zn^{2+}$  from MT-3 with DTPA, however, does not take into account the competition from protonation on a *per-metal* basis, but on a *per-protein* basis. The former is determined by first solving for the  $K_{MP}$  on a *per-protein* basis by multiplying the  $K_{ITC}$  and  $K_{ML}$  by the stoichiometry,  $n_{ITC}$ . Other values, such as  $[H^+]$ , for example, remain constant. The resulting *per-protein* equilibrium constant is then divided by the experimental stoichiometry to determine the proton-corrected *per-metal* equilibrium constant.

### **Cu<sup>+</sup> Binding to MT-3 and Its $\alpha$ and $\beta$ Domains in Excess Acetonitrile (MeCN)**

Studies of  $Cu^+$  binding to proteins often introduce this metal ion from anaerobic aqueous solutions prepared with  $[Cu(MeCN)_4]PF_6$  and excess MeCN, which stabilizes the  $Cu^+$  from disproportionation to  $Cu^{2+}$  and  $Cu^0$ . These solutions contain predominantly  $Cu^+(MeCN)_{3(aq)}$  ( $\log \beta_3 = 4.23$ ), as  $Cu^+(MeCN)_{4(aq)}$  is only marginally more stable.<sup>1</sup> To correlate our ITC measurements of  $Cu^+$  binding to MT with previous studies that used MeCN to stabilize the  $Cu^+$ , especially measurements on MT-1a that characterized the species with ESI-MS,<sup>2</sup> we titrated  $Cu^+$  solutions that were stabilized by a 10-fold excess of MeCN into solutions of  $Zn_7MT-3$  and its  $\alpha$  and  $\beta$  domains. Representative data for these ITC measurements are shown in Figure S6.

Due to several unknown competing equilibria (for example  $Zn^{2+}$ -MeCN) in these titrations, as well as concern about the impact of the large excess of MeCN on the protein in the cell, which is required for the ITC measurements, quantitative analysis of the  $Cu^+$  binding constants and thermodynamics is not possible or prudent. However, the titration isotherms do provide evidence for different populations of  $Cu^+$  binding to MT-3 with the weakly competing  $Cu^+$ -stabilizing ligand MeCN. The titration of  $Cu^+$  into MT-3 shows three distinct binding events, an initial subtle one (see insert) at an approximate stoichiometry of 8  $Cu^+$ , a second at 10  $Cu^+$ , and a third at 20  $Cu^+$ . The titration of  $Cu^+$  into  $Zn_3\beta MT3$  also shows 3 binding events, the first with a stoichiometry of 2  $Cu^+$  and a significantly greater exothermic enthalpy, followed by a second at 4  $Cu^+$  and a third at approximately 9  $Cu^+$ . Finally, the titration of  $Cu^+$  into  $Zn_4\alpha MT3$  shows 2 binding events, the first at a stoichiometry of 6  $Cu^+$ , followed by a second at 11  $Cu^+$ . In all three cases, the final stoichiometry matches a 1:1 ratio of  $Cu^+$ -to-Cys in the protein, as found by ESI-MS on samples prepared with a similar addition of  $Cu^+$  in excess MeCN.

These results contrast with those found when physiologically relevant GSH is used to stabilize the  $Cu^+$  and it competes with MT for the  $Zn^{2+}$ . The ITC data with MeCN reflect  $Cu^+$  displacement of  $Zn^{2+}$  from the protein and the eventual formation of species with  $Cu^+$  bound to each Cys. The presence of GSH represents a situation more relevant to *in vivo* conditions.

Nevertheless, the ITC data with MeCN provide corroborating evidence for initial, and more tightly bound,  $\text{Cu}^+$  in  $\text{Cu}^+_4$  clusters in the  $\beta$  domain and the  $\alpha$  domain, as indicated by  $\text{Cu}^+_8\text{MT-3}$ .

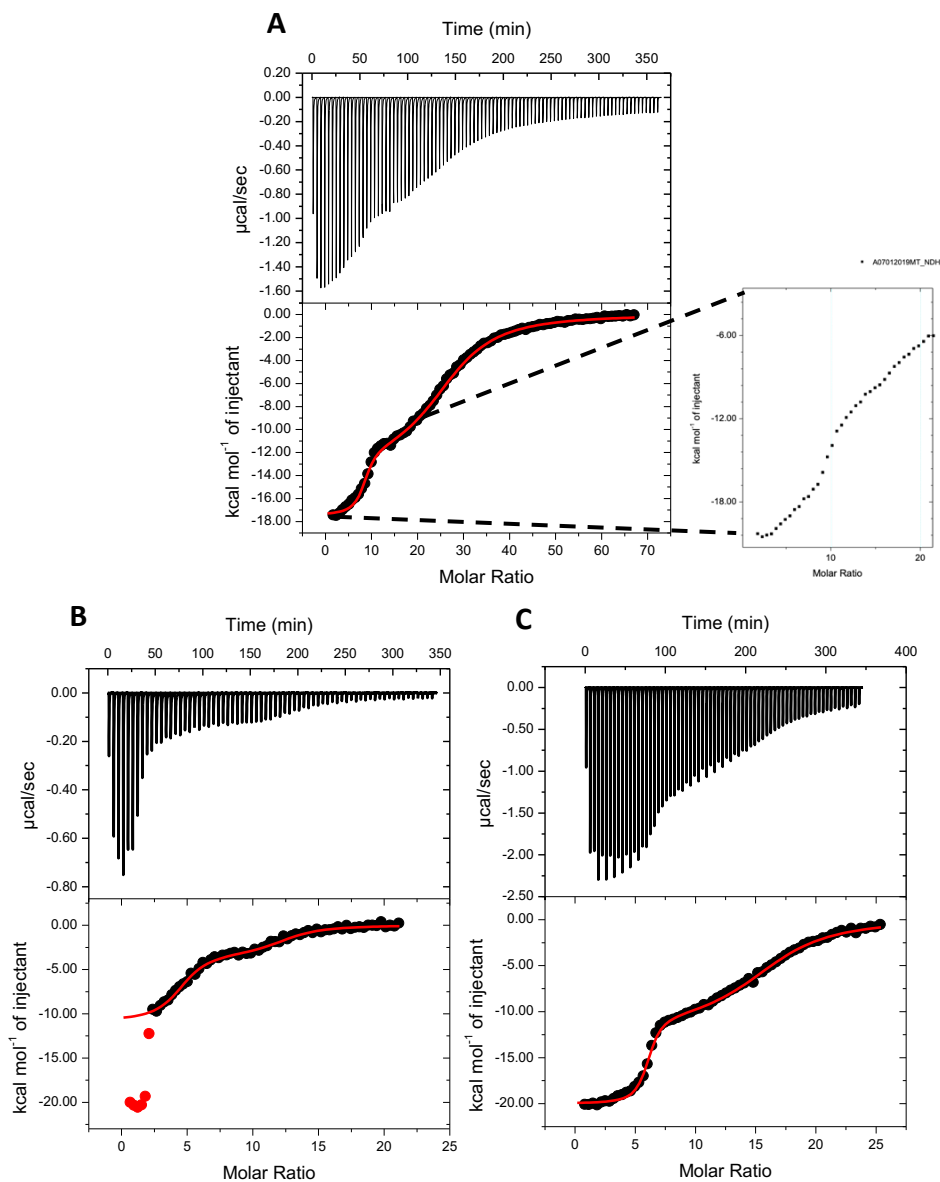

**Figure S6.** Representative thermograms for  $\text{Cu}^+$  titrated into **A.**  $\text{Zn}_7\text{MT-3}$ , **B.**  $\text{Zn}_3\beta\text{MT-3}$ , **C.**  $\text{Zn}_4\alpha\text{MT-3}$  in 100 mM Bis-Tris, 150 mM NaCl, 6 mM MeCN, pH 7.4; fitting the isotherms gives approximate binding stoichiometries for **A:**  $n_1 = 8$ ,  $n_2 = 10$ ,  $n_3 = 20$ ; **B:**  $n_1 = 2$ ,  $n_2 = 4$ ,  $n_3 = 9$ ; **C:**  $n_1 = 6$  and  $n_2 = 11$ .

1. Martell, A. E.; Smith, R. K. Critical Stability Constants, Standard Reference Database 46. National Institute of Standards and Technology: Gaithersburg, MD 2001.

2. Scheller, J. S.; Irvine, G. W.; Wong, D. L.; Hartwig, A.; Stillman, M. J. Stepwise Copper(I) Binding to Metallothionein a Mixed Cooperative and Non-Cooperative Mechanism for All 20 Copper Ions. *Metallomics* **2017**, 9 (5), 447–462.
